# Supplementary material for: Suehiro Maruo. El Sade del manga
Source: Oxford University Press journal article supplement (doi:10.1242/jeb.146571), 2005-01-01
Supplement: jeb146571supp.pdf [file jeb146571supp.pdf]

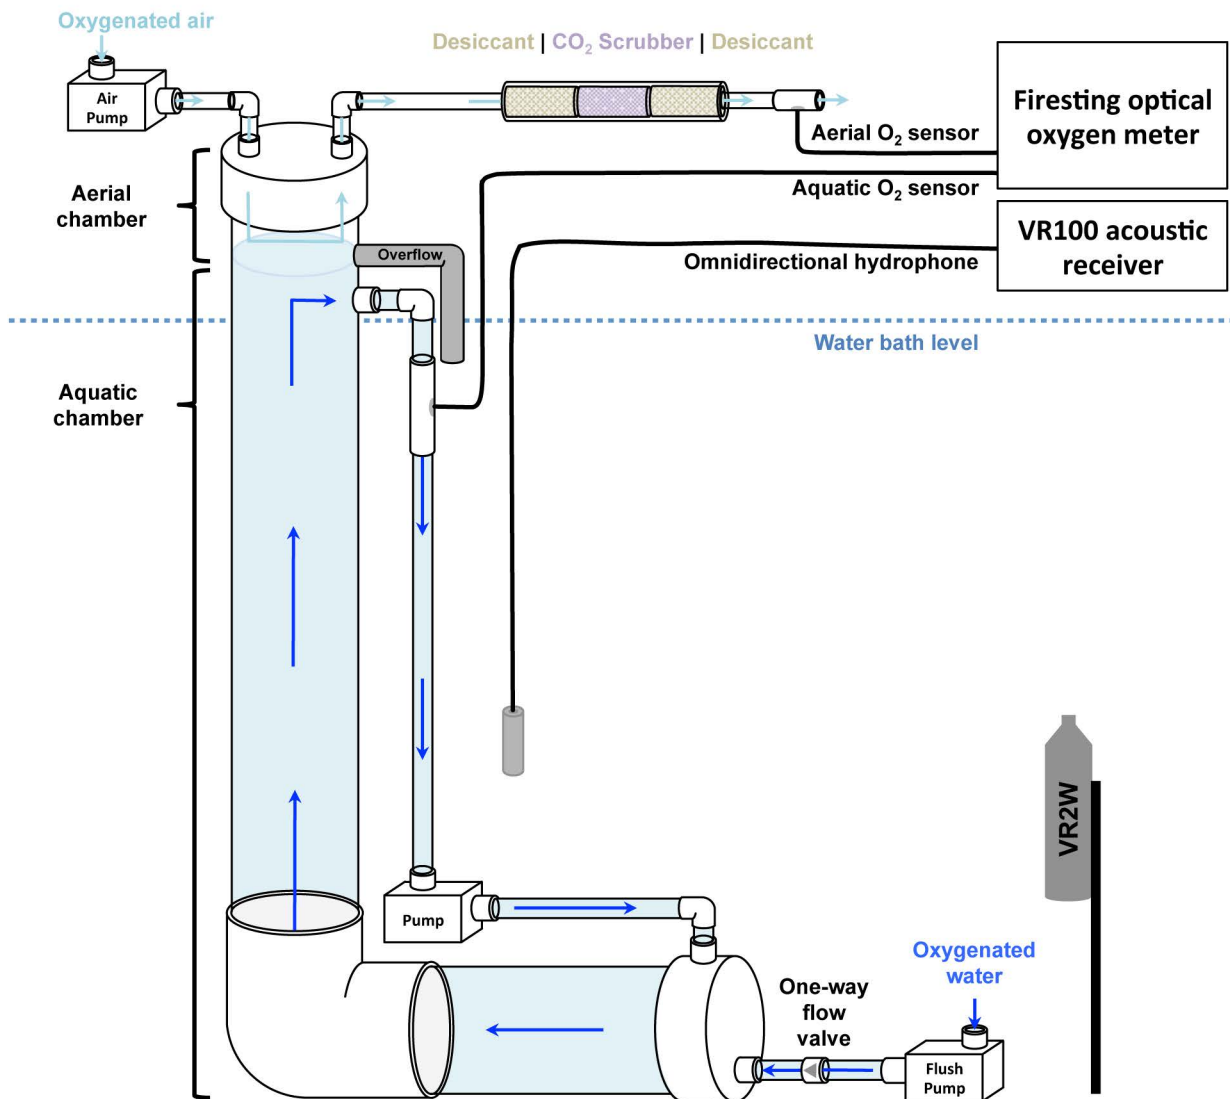

**Figure S1.** Schematic of bimodal respirometers designed to simultaneously measure pulmonary and cutaneous oxygen consumption by sea snakes (based on designs previously described by Dabruzzi *et al.* 2012), while also monitoring body acceleration using acoustic telemetry (VR100 and VR2W receivers). Four L-shaped respirometers (height 165 cm, width 80 cm) were constructed using transparent acrylic tubing (150 mm outer diameter) and opaque Polyvinyl chloride connector fittings. Respirometers were airtight and held a fixed amount of water ( $29.73 \pm 0.61$  L) with a fixed air space ( $1.05 \pm 0.03$  L) at the top to capture movements related to diving and surfacing. Chambers were large enough to allow snakes free movement, but small enough to accurately quantify  $\dot{V}O_{2cut}$ , with negligible gas exchange across the air-water interface.

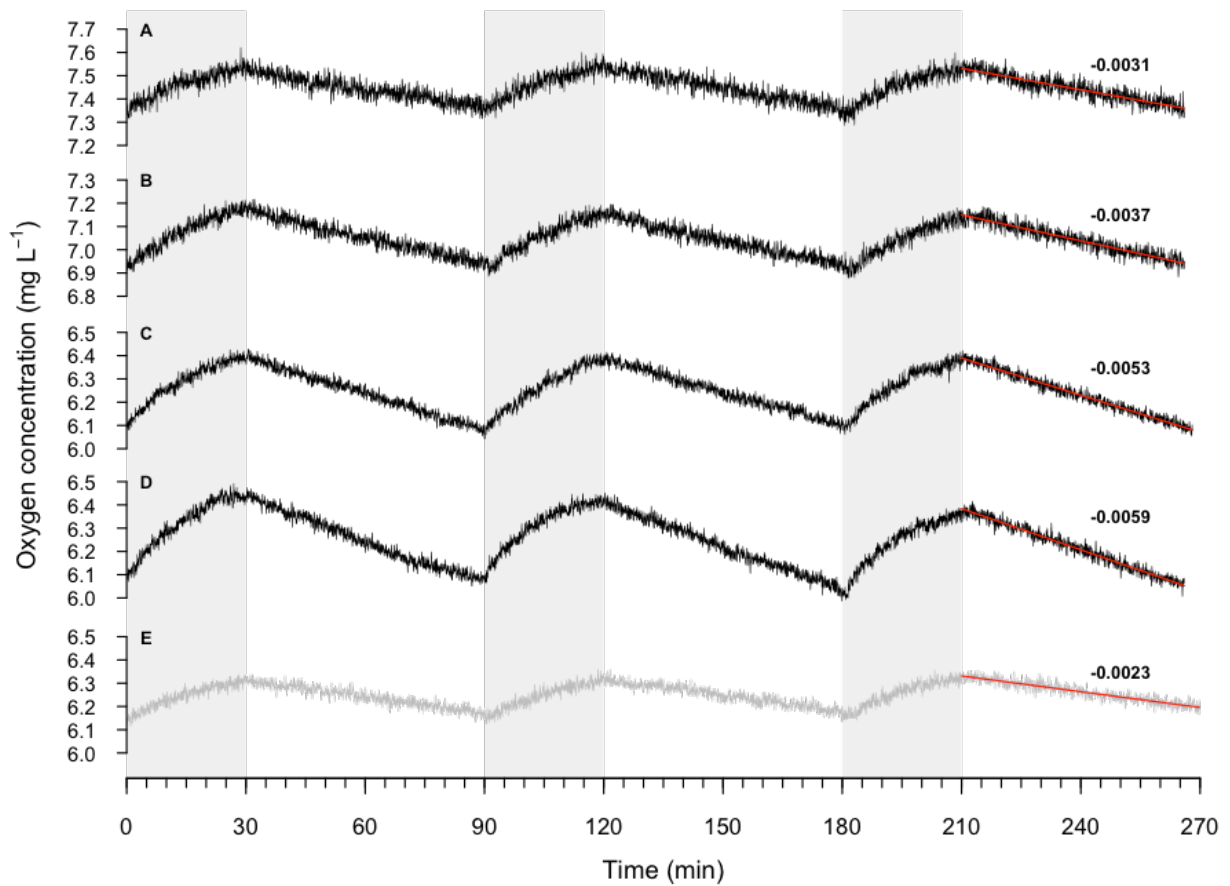

**Figure S2.** Raw oxygen traces for a representative sea snake illustrating the cutaneous oxygen consumption ( $\dot{V}O_{2cut}$ ) at four temperature treatments (A) 21°, (B) 24°, (C) 27° and (D) 30°C. Background (microbial) respiration was measured at all temperatures and subtracted from sea snake  $\dot{V}O_{2cut}$ ; a representative background trace at 30°C is presented (E). Grey shading represents periods when flush pumps were running. Red lines represent the measurements of change in oxygen concentration ( $\Delta cO_2$ ) measured during sealed cycles ( $\Delta t$ ), as in equation 1 of the main text.

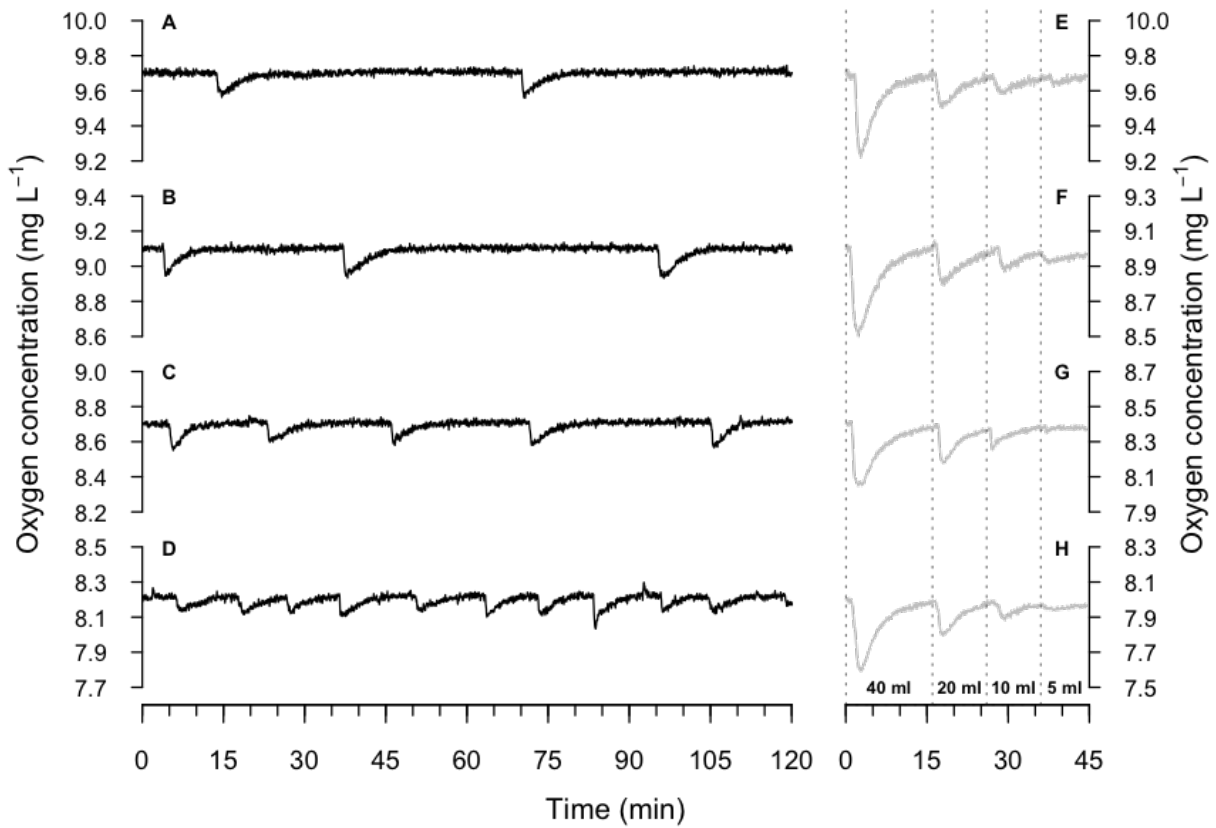

**Figure S3.** Raw oxygen traces for a representative sea snake testing the pulmonary consumption of oxygen at four temperature treatments; (A) 21°C, (B) 24°C, (C) 27°C and (D) 30°C. Each drop in oxygen concentration along the trace represents one breathing bout, with breathing rate increasing in warmer waters. Fixed volumes of N<sub>2</sub> (40, 20, 10 and 5 ml) were injected during periods between snake breathing bouts (E – H) to provide reference points for the magnitude of the snake breathing bouts.
